# Supplementary material for: Genome-Wide Identification and Characterization of FBA Gene Family in Polyploid Crop Brassica napus
Source: MDPI journal article supplement (doi:10.3390/ijms20225749), 2019-11-15
Supplement: s1 [file s1]

Table S6. List of primers for qRT-PCR.

[illegible]

[illegible]

WP\_00  
C0000

**Figure S2.** The alignment of class-II FBA protein sequences among *B. napus* and other species. The activity sites are indicated in red arrows. The black frames represent the fructose-bisphosphate aldolase class-II (PF01116) domain. *TaFBA*, *BnaFBA*, *BolFBA*, *BraFBA* indicated the *FBA* genes from *T. Aestivum*, *B. napus*, *B. oleracea* and *B. rapa*, respectively. *WP\_003043438.1* was class II fructose-1,6-bisphosphate aldolase from *Thermus aquaticus*.

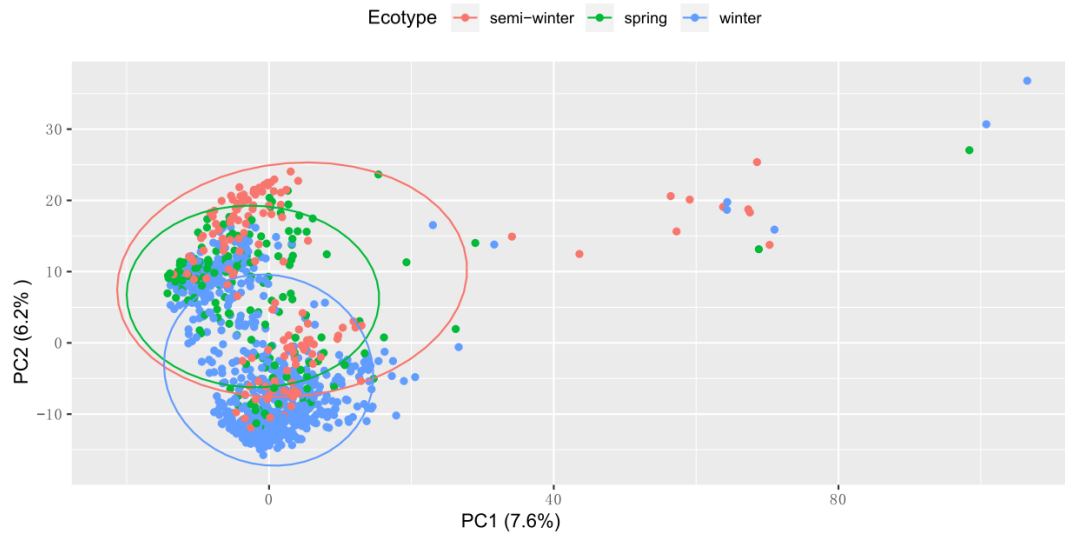

**Figure S3.** PCA plot of the first two components (PC1 and PC2) of the 991 accessions.
